# Supplementary material for: Design of anti-thermal quenching Pr3+-doped niobate phosphors based on a charge transfer and intervalence charge transfer band excitation-driven strategy
Source: Royal Society of Chemistry journal article supplement (doi:10.1039/d3qi01009k), 2023-01-01
Supplement: d3qi01009k1.pdf [file d3qi01009k1.pdf]

# Supporting Information

Design of Anti-thermal Quenching Pr<sup>3+</sup>-doped Niobate Phosphor Based on Charge Transfer and Intervalence Charge Transfer Band Excitation-driven Strategy

Chunwei Yang,<sup>a</sup> Ning Guo,<sup>a,\*</sup> Song Qu,<sup>a</sup> Qinchan Ma,<sup>a</sup> Jianxia Liu,<sup>a</sup> Shunyi Chen,<sup>a</sup> and Ruizhuo Ouyang<sup>a</sup>,

<sup>a</sup> Department of Chemistry, University of Shanghai for Science and Technology, Shanghai 200093, P. R. China.

\*Corresponding author: E-mail: [guoning@usst.edu.cn](mailto:guoning@usst.edu.cn)

## **Contents**

|                                         |                |
|-----------------------------------------|----------------|
| <b>Part 1. Supporting Figures .....</b> | <b>S1-S10</b>  |
| <b>Part 2. Supporting Tables.....</b>   | <b>S11-S13</b> |

## Part 1. Supporting Figures

### Figure S1

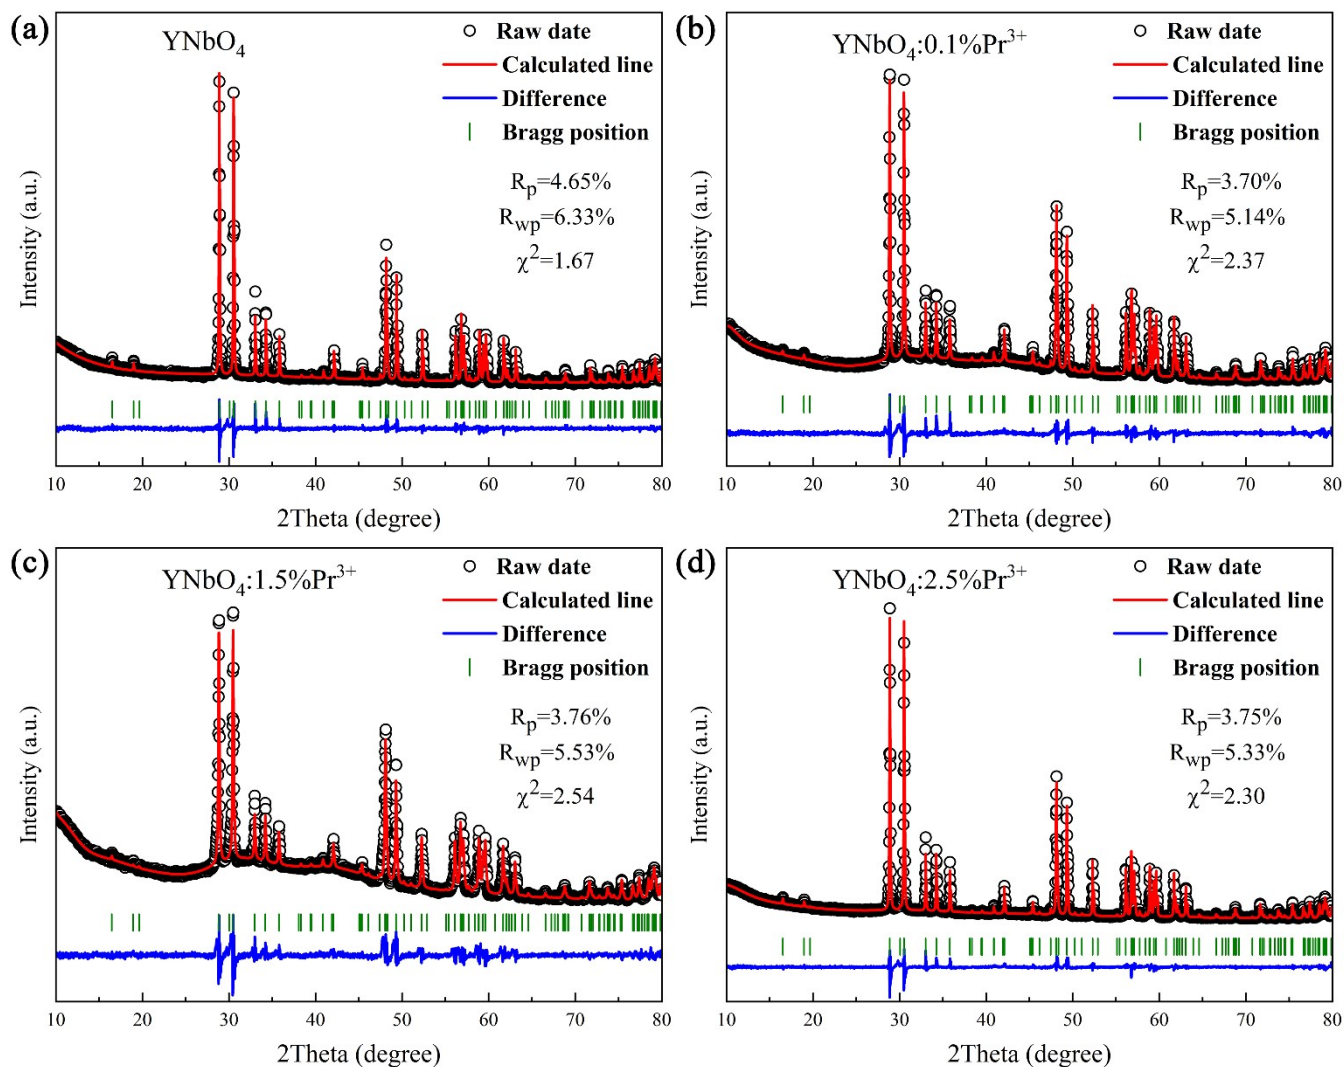

Figure S1. The Rietveld refinement plot of the X-ray diffraction pattern of  $\text{YNbO}_4:x\%\text{Pr}^{3+}$  ( $x = 0, 0.1, 1.5, 2.5$ ).

**Figure S2**

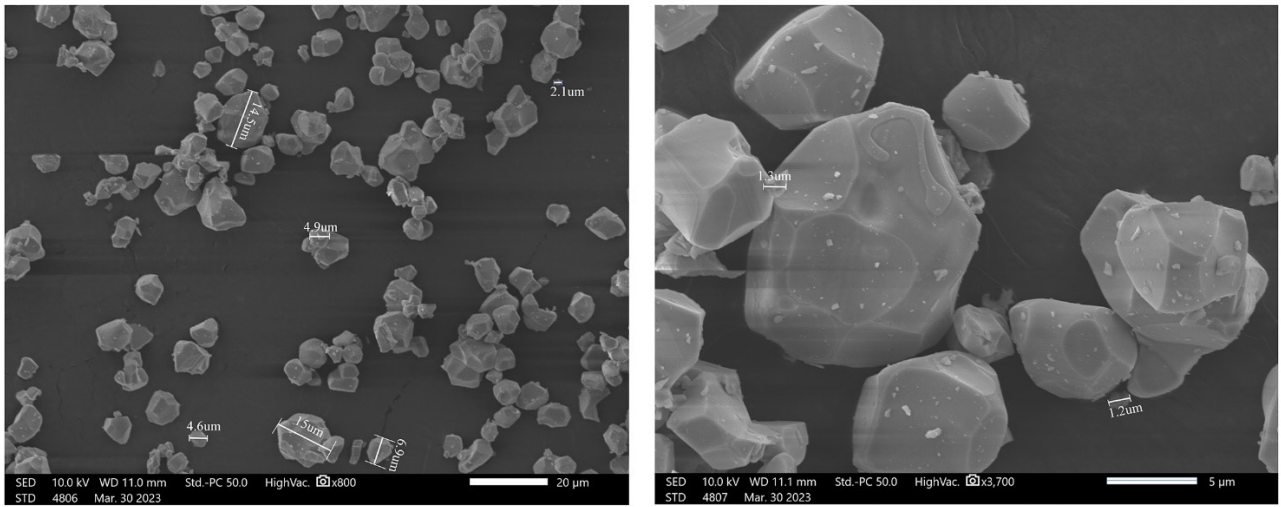

Figure S2. The SEM image of  $\text{YNbO}_4:0.5\%\text{Pr}^{3+}$ .

Figure S3

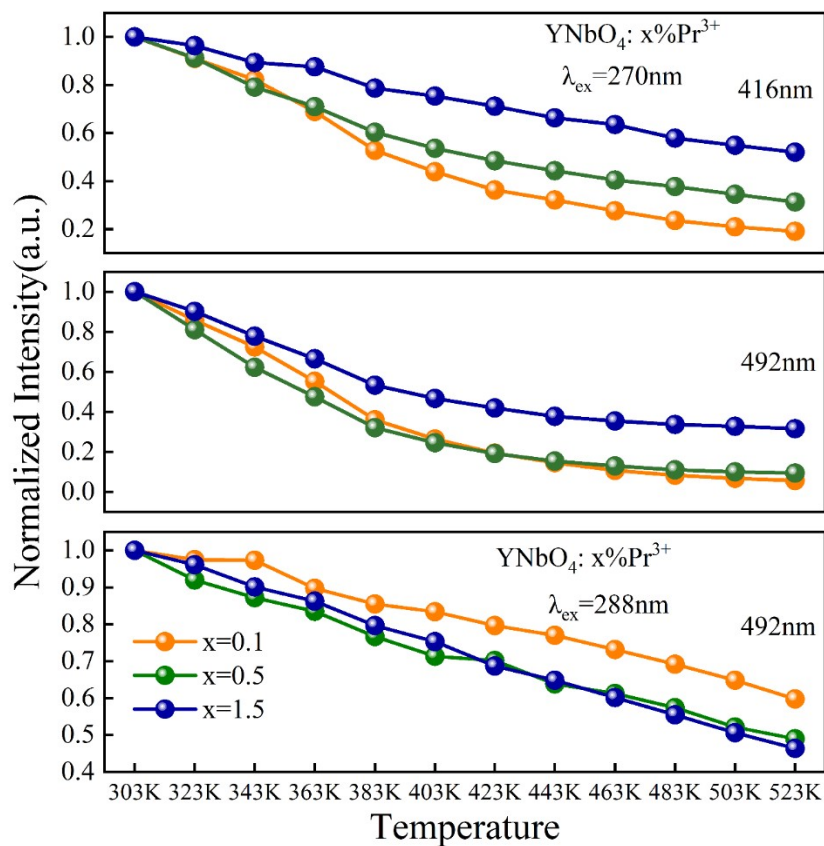

Figure S3. Temperature behavior of integrated intensity of matrix emission and <sup>3</sup>P<sub>0</sub> emission of YNbO<sub>4</sub>:x%Pr<sup>3+</sup> (x = 0.1, 0.5, 1.5) under excitation of 270 nm and 288 nm.

Figure S4

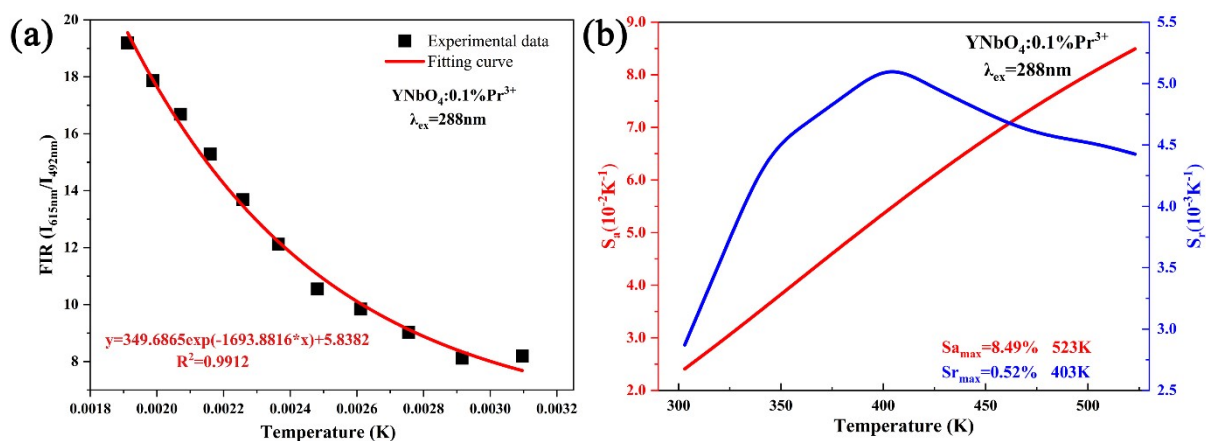

Figure S4. (a) Experimental data and fitted plots of FIR ( $I_{615\text{ nm}}/I_{492\text{ nm}}$ ) versus temperature in the range of 303–523 K for YNbO<sub>4</sub>:0.1%Pr<sup>3+</sup>. (b) Plot of absolute sensitivity  $S_a$  and relative sensitivity  $S_r$  vs. temperature (303–523 K) for YNbO<sub>4</sub>:0.1%Pr<sup>3+</sup> under excitation at 288 nm.

Figure S5

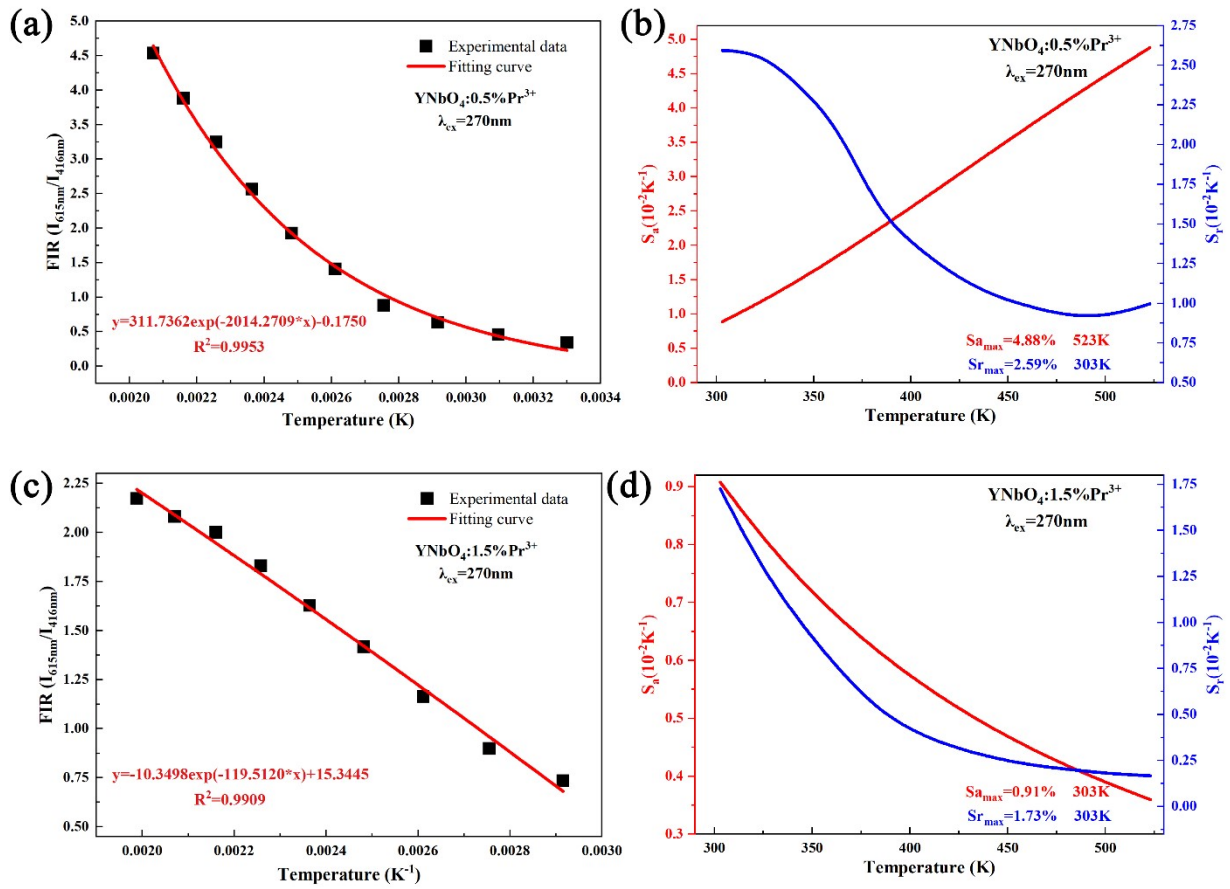

Figure S5. (a) and (c) Experimental data and fitted curves of FIR ( $I_{615\text{ nm}}/I_{416\text{ nm}}$ ) vs. temperature for YNbO<sub>4</sub>:x%Pr<sup>3+</sup> (x = 0.5, 1.5) in the range of 303–523 K. (b) and (d) Plot of absolute sensitivity  $S_a$  and relative sensitivity  $S_r$  vs. temperature (303–523 K) for YNbO<sub>4</sub>:x%Pr<sup>3+</sup> (x = 0.5, 1.5) under excitation at 270 nm.

Figure S6

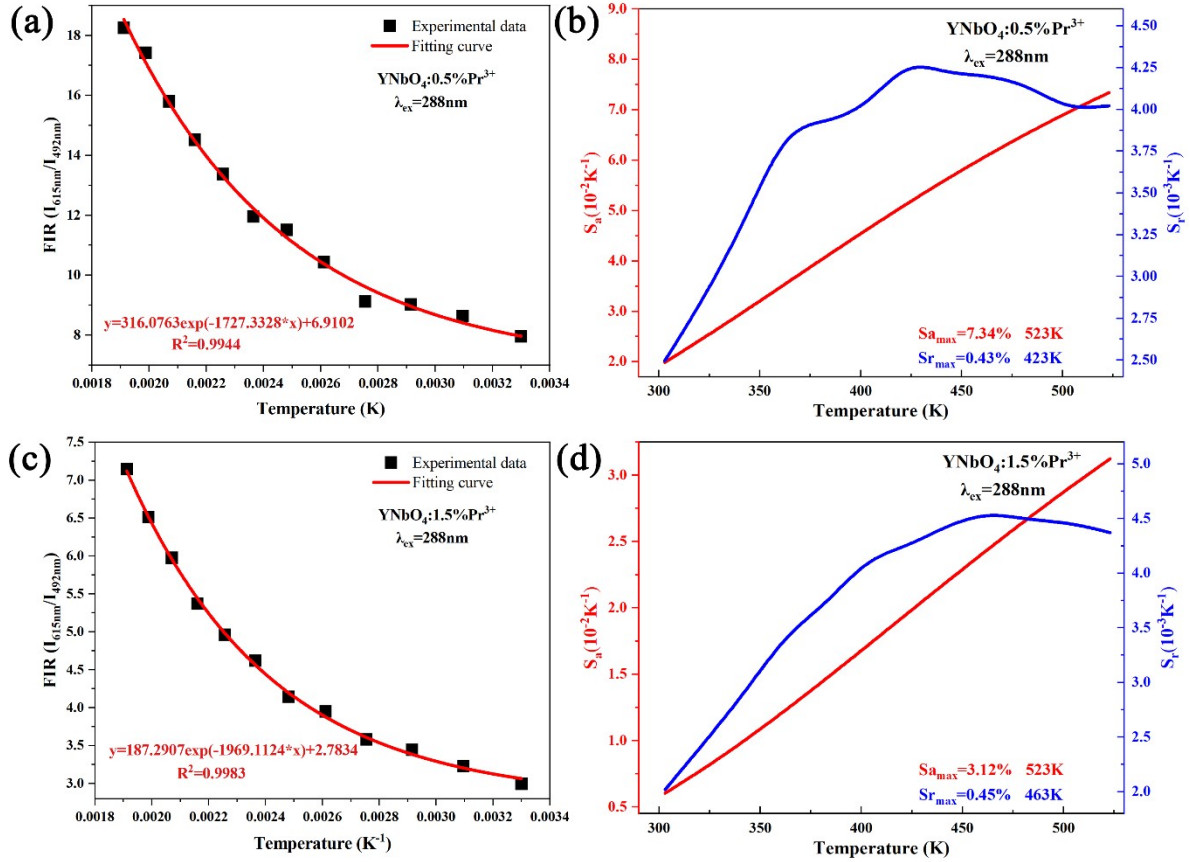

Figure S6. (a) and (c) Experimental data and fitted curves of FIR ( $I_{615\text{ nm}}/I_{492\text{ nm}}$ ) vs. temperature for YNbO<sub>4</sub>:x%Pr<sup>3+</sup> (x = 0.5, 1.5) in the range of 303–523 K. (b) and (d) Plot of absolute sensitivity  $S_a$  and relative sensitivity  $S_r$  vs. temperature (303–523 K) for YNbO<sub>4</sub>:x%Pr<sup>3+</sup> (x = 0.5, 1.5) under excitation at 288 nm.



Figure S7

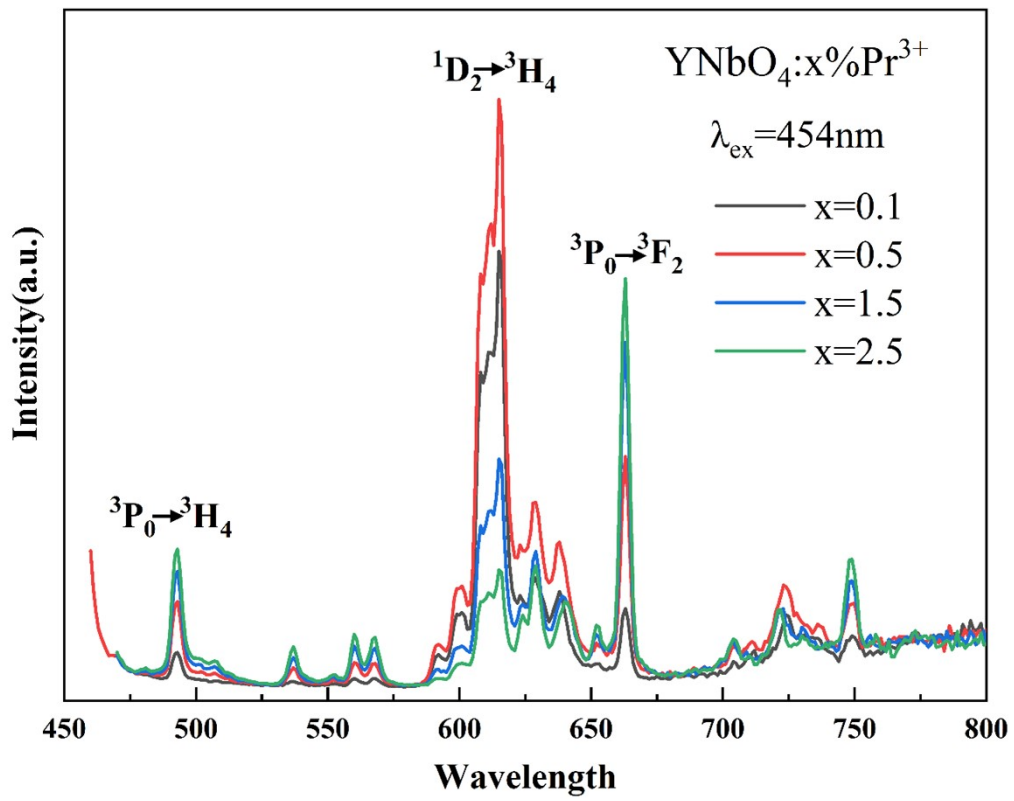

Figure S7. PL spectrum of YNbO<sub>4</sub>:x%Pr<sup>3+</sup> (x = 0, 0.1, 0.5, 1.5, 2.5) phosphors excited at 454 nm.

Figure S8

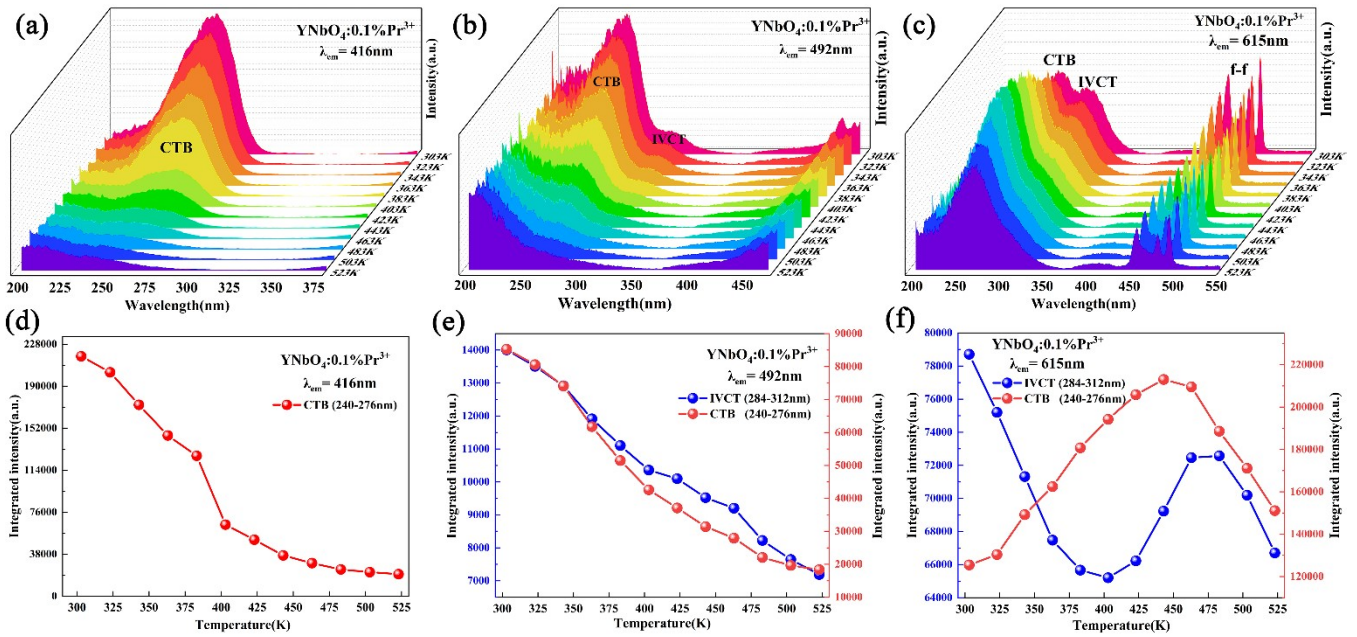

Figure S8. (a) Temperature-dependent PLE spectra of YNbO<sub>4</sub>:0.1%Pr<sup>3+</sup> phosphor under the monitoring of 416 nm, (b) 492 nm and (c) 615 nm. (d-f) Temperature-dependent curve of luminescence integrated intensity in the PLE spectrum of YNbO<sub>4</sub>:0.1%Pr<sup>3+</sup> phosphor.

Figure S9

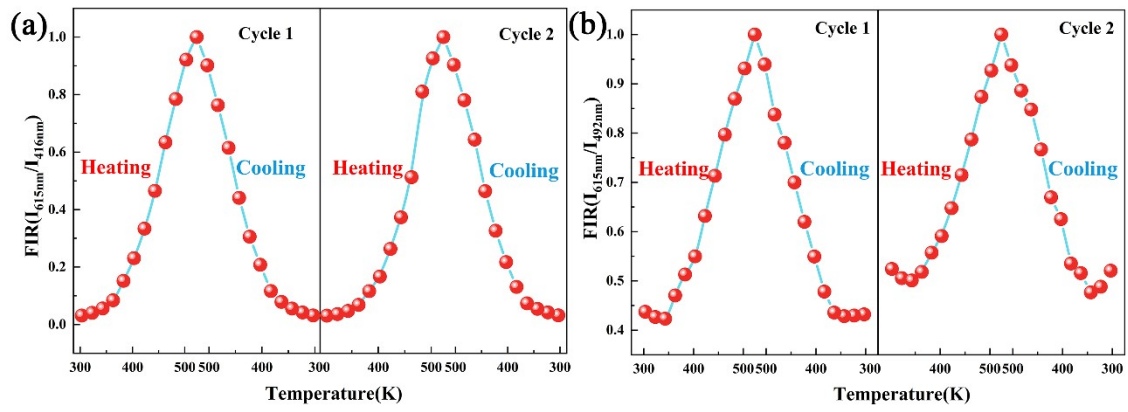

Figure S9. (a) FIR value of  $YNbO_4:0.1\%Pr^{3+}$  phosphor in temperature-cycle test under excitation of 270 nm and (b) 288 nm.

Figure S10

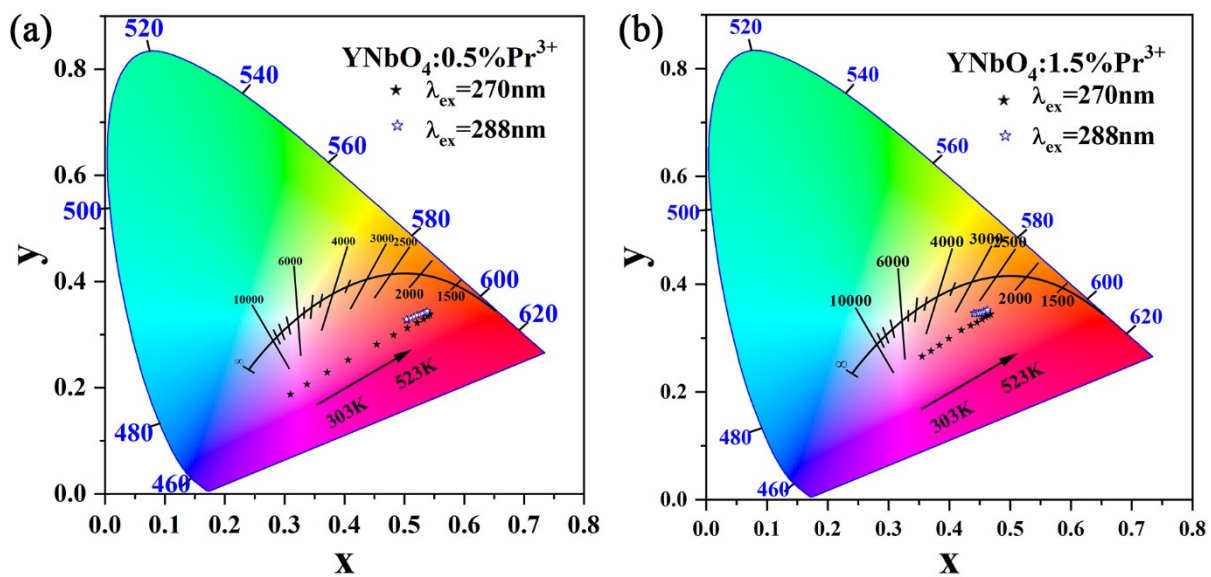

Figure S10. (a) and (b) CIE chromaticity diagram and photograph of  $\text{YNbO}_4:x\%\text{Pr}^{3+}$  ( $x = 0.5, 1.5$ ) at different temperatures under 270 nm and 288 nm excitation.

## Part 2. Supporting Tables

### Table S1

Table S1. Refinement results of the atomic coordinates of  $\text{YNbO}_4:x\%\text{Pr}^{3+}$  ( $x = 0, 0.1, 0.5, 1.5, 2.5$ ).

| Formula                             | Atom | x          | y          | z          | Occ.      | Mult |
|-------------------------------------|------|------------|------------|------------|-----------|------|
| $\text{YNbO}_4$                     | Y1   | 0.0000     | 0.6219(3)  | 0.25000    | 1.0000    | 4    |
|                                     | Nb1  | 0.0000     | 0.1437(23) | 0.25000    | 1.0000    | 4    |
|                                     | O1   | 0.2512(25) | 0.9409(8)  | 0.3451(29) | 1.0000    | 8    |
|                                     | O2   | 0.3451(29) | 0.2872(7)  | 0.2970(3)  | 1.0000    | 8    |
| $\text{YNbO}_4:0.1\%\text{Pr}^{3+}$ | Y1   | 0.00000    | 0.6213(4)  | 0.25000    | 0.9990    | 4    |
|                                     | Pr1  | 0.00000    | 0.6213(4)  | 0.25000    | 0.0010    | 4    |
|                                     | Nb1  | 0.00000    | 0.1432(24) | 0.25000    | 1.0000    | 4    |
|                                     | O1   | 0.2661(27) | 0.0372(8)  | 0.3555(30) | 1.0000    | 8    |
|                                     | O2   | 0.2956(28) | 0.2875(8)  | 0.282(4)   | 1.0000    | 8    |
| $\text{YNbO}_4:0.5\%\text{Pr}^{3+}$ | Y1   | 0.00000    | 0.6222(4)  | 0.25000    | 0.9950    | 4    |
|                                     | Pr1  | 0.00000    | 0.6000(5)  | 0.25000    | 0.0050    | 4    |
|                                     | Nb1  | 0.00000    | 0.1442(20) | 0.25000    | 0.9702    | 4    |
|                                     | O1   | 0.2692(18) | 0.0344(6)  | 0.3642(21) | 1.017(15) | 8    |
|                                     | O2   | 0.3081(17) | 0.2865(6)  | 0.2772(28) | 1.056(13) | 8    |
| $\text{YNbO}_4:1.5\%\text{Pr}^{3+}$ | Y1   | 0.00000    | 0.6224(7)  | 0.25000    | 0.9850    | 4    |
|                                     | Pr1  | 0.00000    | 0.625(25)  | 0.25000    | 0.0150    | 4    |
|                                     | Nb1  | 0.00000    | 0.1440(4)  | 0.25000    | 1.0000    | 4    |
|                                     | O1   | 0.266(4)   | 0.0337(13) | 0.3560(4)  | 1.0000    | 8    |
|                                     | O2   | 0.295(4)   | 0.2863(12) | 0.271(7)   | 1.0000    | 8    |
| $\text{YNbO}_4:2.5\%\text{Pr}^{3+}$ | Y1   | 0.00000    | 0.6210(7)  | 0.25000    | 0.9750    | 4    |
|                                     | Pr1  | 0.00000    | 0.6200(20) | 0.25000    | 0.0250    | 4    |
|                                     | Nb1  | 0.00000    | 0.1436(18) | 0.25000    | 1.0026    | 4    |
|                                     | O1   | 0.2525(23) | 0.0373(7)  | 0.3377(26) | 0.9224    | 8    |
|                                     | O2   | 0.2929(21) | 0.2849(6)  | 0.2957(29) | 0.9669    | 8    |

**Table S2**Table S2. Refinement results of the atomic coordinates of  $\text{YNbO}_4:x\%\text{Pr}^{3+}$  ( $x = 0, 0.1, 0.5, 1.5, 2.5$ ).

| parameter                           | space group | a(Å)   | b(Å)     | c(Å)   | $\alpha = \gamma(^{\circ})$ | $\beta(^{\circ})$ | V(Å <sup>3</sup> ) |
|-------------------------------------|-------------|--------|----------|--------|-----------------------------|-------------------|--------------------|
| $\text{YNbO}_4$                     | C12/c1(15)  | 7.0358 | 10.94628 | 5.2972 | 90                          | 134.0726          | 293.1080           |
| $\text{YNbO}_4:0.1\%\text{Pr}^{3+}$ | C12/c1(15)  | 7.0354 | 10.94520 | 5.2967 | 90                          | 134.0753          | 293.1080           |
| $\text{YNbO}_4:0.5\%\text{Pr}^{3+}$ | C12/c1(15)  | 7.0368 | 10.94805 | 5.2981 | 90                          | 134.0765          | 293.2279           |
| $\text{YNbO}_4:1.5\%\text{Pr}^{3+}$ | C12/c1(15)  | 7.038  | 10.95050 | 5.2992 | 90                          | 134.0870          | 293.3720           |
| $\text{YNbO}_4:2.5\%\text{Pr}^{3+}$ | C12/c1(15)  | 7.041  | 10.95654 | 5.3021 | 90                          | 134.0909          | 293.8038           |

**Table S3**

Table S3. Temperature sensing performances of several typical temperature sensors.

| Phosphors                                              | $\lambda_{\text{ex}}$ (nm) | Temperature range(K) | Mode | Max. $S_a$ (K <sup>-1</sup> ) | Max. $S_r$ (%K <sup>-1</sup> ) | Ref.      |
|--------------------------------------------------------|----------------------------|----------------------|------|-------------------------------|--------------------------------|-----------|
| Gd <sub>2</sub> ZnTiO <sub>6</sub> :Pr <sup>3+</sup>   | 300                        | 293-433              | FIR  | 0.63                          | 1.67                           | 52        |
| Ba <sub>0.995</sub> TiO <sub>3</sub> :Pr <sup>3+</sup> | 370                        | 313-413              | FIR  | 0.0575                        | 2.77                           | 53        |
| YNbO <sub>4</sub> :Pr <sup>3+</sup> ,Tb <sup>3+</sup>  | 295                        | 298-538              | FIR  | 0.0125                        | 1.01                           | 54        |
| CaMoO <sub>4</sub> :Pr <sup>3+</sup>                   | 279                        | 303-573              | FIR  | 0.01684                       | 2.216                          | 55        |
| CaWO <sub>4</sub> :Pr <sup>3+</sup>                    | 290/450                    | 303-573              | FIR  | /                             | 1.5                            | 56        |
| YNbO <sub>4</sub> :Pr <sup>3+</sup>                    | 270                        | 303-523              | FIR  | 0.0426                        | 3.74                           | This work |
| YNbO <sub>4</sub> :Pr <sup>3+</sup>                    | 288                        | 303-523              | FIR  | 0.0849                        | 0.52                           | This work |
